# Supplementary material
Source: PubMed Central journal article supplement (PMC7954870)

# Supplemental Digital Content 6. Length of hospital stay after liver resection (LR) and radiofrequency ablation (RFA).

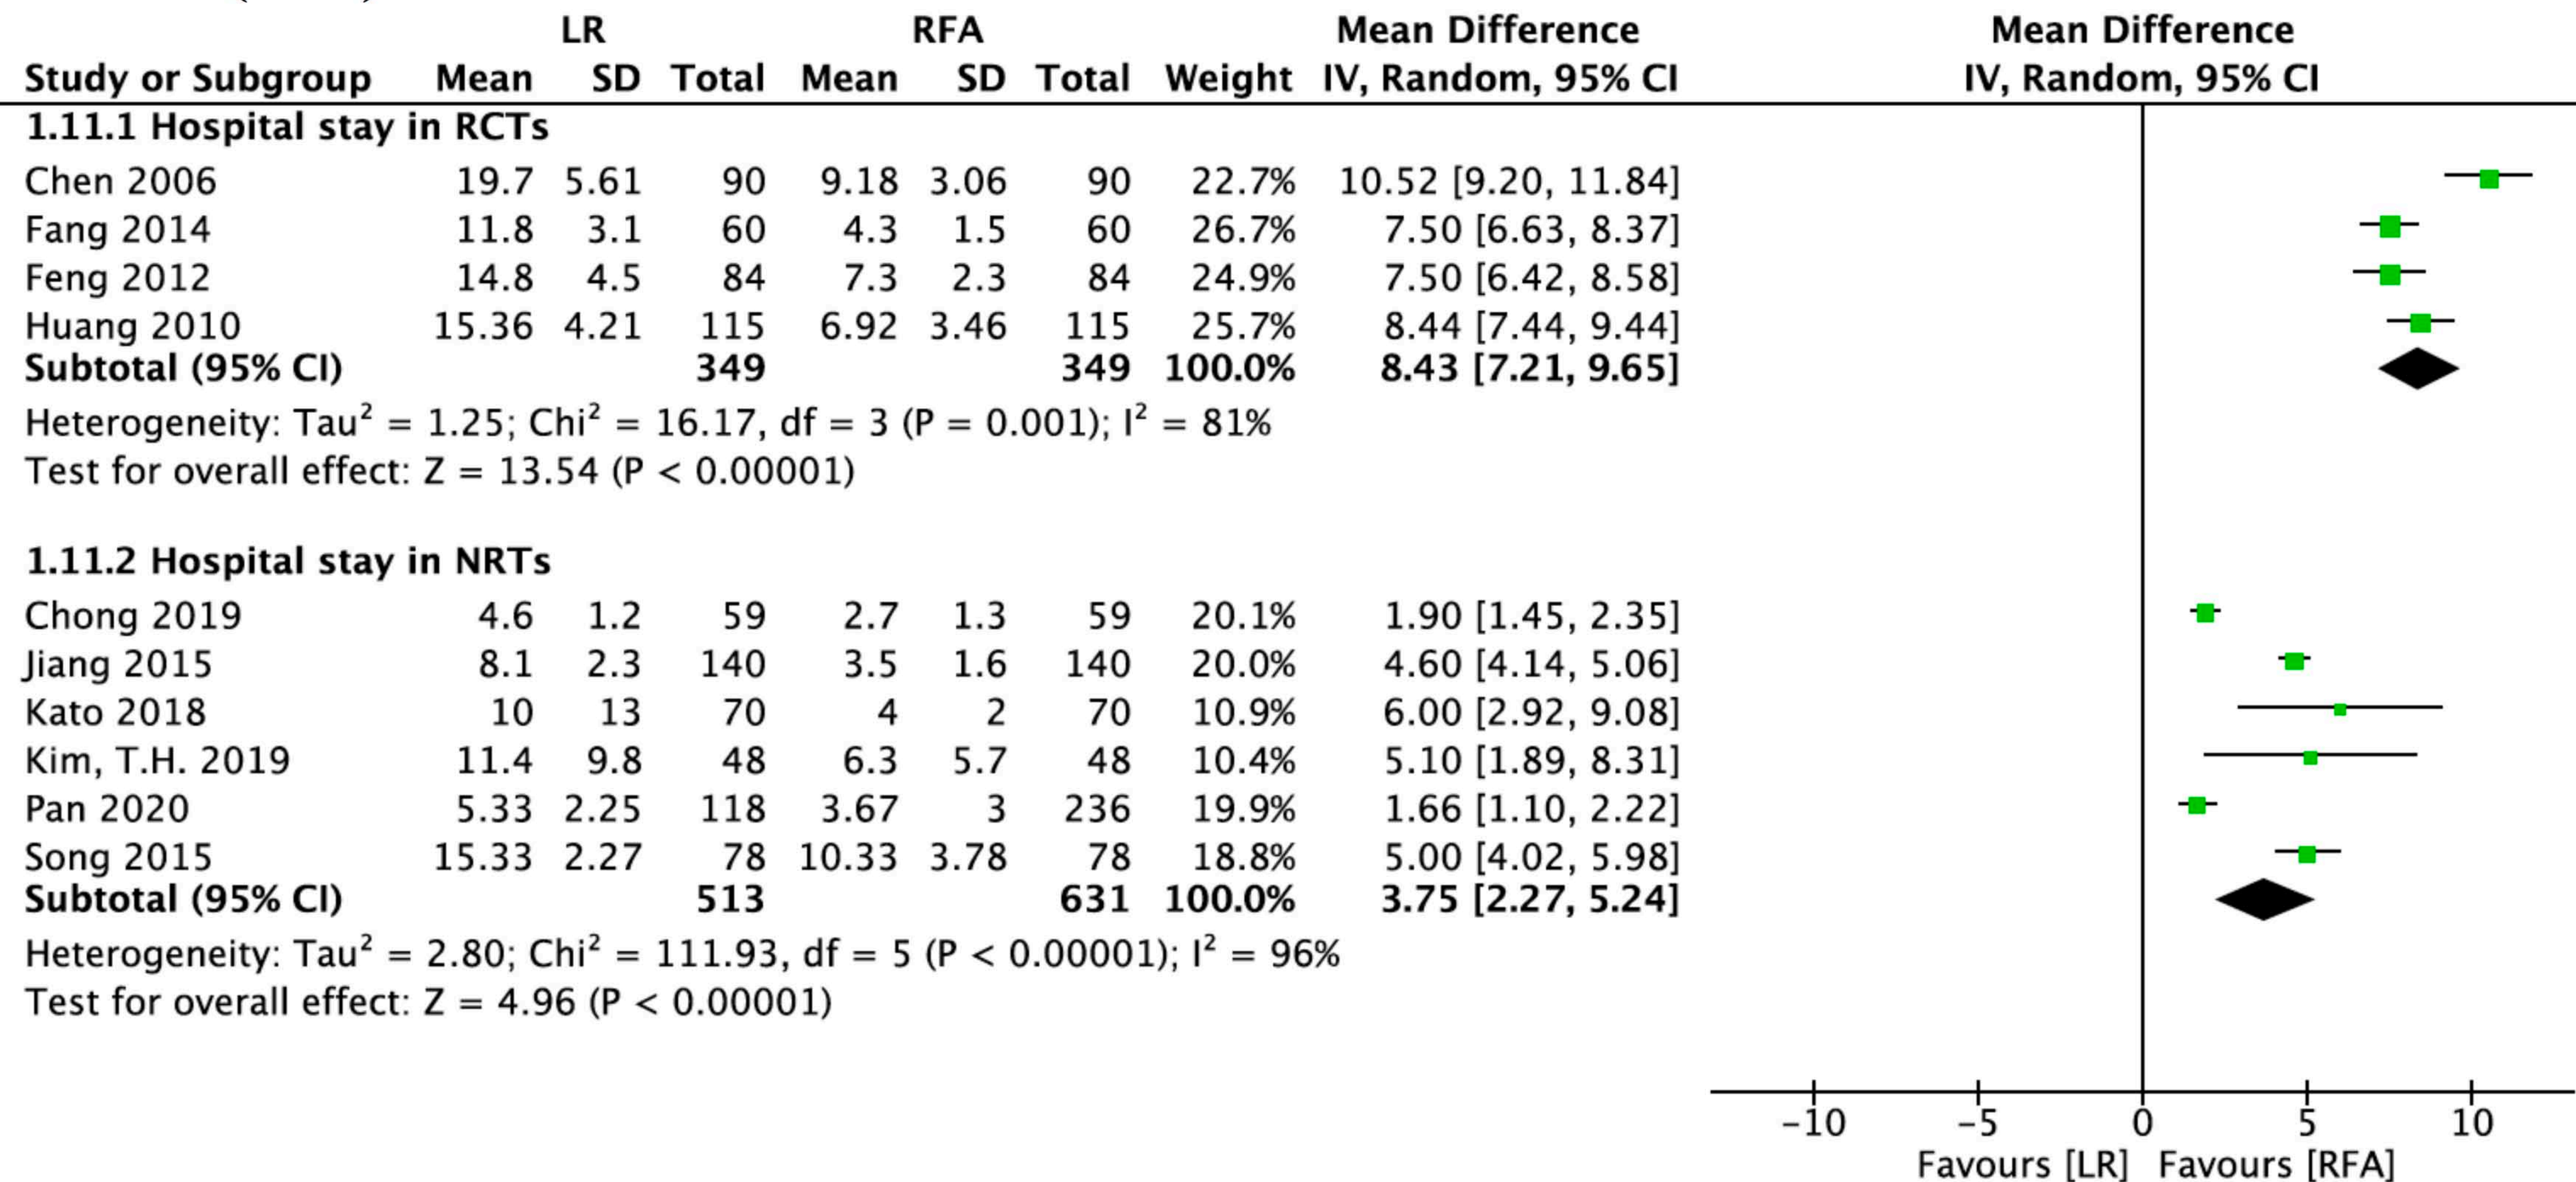

Supplement: NIHMS1652879-supplement-Supplemental_Table_3.pdf [file NIHMS1652879-supplement-Supplemental_Table_3.pdf]
